# Supplementary material
Source: Springer Nature journal article supplement (https://www.springermedizin.de/resource/supplementary/13058_2013_3590_MOESM2_ESM.pdf/9703886)
Supplement: MOESM2 [file 9703886]

**Additional Table 2-1** Associations of mammographic density (MD) with breast cancer by study : odds ratios (95% confidence interval)<sup>a</sup>

| Category of MD | MMHS              | MCBCS             | NHS               | NHS 2             | MCMAM             | SFMR              |
|----------------|-------------------|-------------------|-------------------|-------------------|-------------------|-------------------|
| 0-10%          | 0.63 (0.45, 0.90) | 0.72 (0.38, 1.35) | 0.64 (0.50, 0.81) | 0.46 (0.27, 0.79) | 0.47 (0.32, 0.71) | 0.78 (0.59, 1.03) |
| 11-25% (ref)   | 1.00 (REF)        | 1.00 (REF)        | 1.00 (REF)        | 1.00 (REF)        | 1.00 (REF)        | 1.00 (REF)        |
| 26-50%         | 1.67 (1.26, 2.22) | 1.96 (1.16, 3.34) | 1.57 (1.31, 1.90) | 1.38 (1.00, 1.92) | 1.70 (1.22, 2.35) | 1.78 (1.43, 2.21) |
| 51%+           | 1.70 (1.11, 2.59) | 2.95 (1.48, 5.87) | 2.09 (1.65, 2.64) | 1.67 (1.15, 2.42) | 2.40 (1.51, 3.81) | 2.43 (1.88, 3.14) |

<sup>a</sup> Adjusted for age and body mass index.

**Additional Table 3-2** Pooled associations of categorical MD<sup>a</sup> with breast cancer overall and by tumor type and age

|                            | Age < 55 |          |                                          | Age 56-64 |          |                                          | Age ≥ 65 |          |                                          | P <sub>age-interaction</sub> |
|----------------------------|----------|----------|------------------------------------------|-----------|----------|------------------------------------------|----------|----------|------------------------------------------|------------------------------|
|                            | Cases    | Controls | OR <sup>b</sup><br>(95% CI) <sup>d</sup> | Cases     | Controls | OR <sup>b</sup><br>(95% CI) <sup>d</sup> | Cases    | Controls | OR <sup>b</sup><br>(95% CI) <sup>d</sup> |                              |
| All breast cancer          |          |          |                                          |           |          |                                          |          |          |                                          | 0.01                         |
| 0-10%                      | 88       | 452      | 0.56<br>(0.43, 0.74)                     | 155       | 523      | 0.60<br>(0.48, 0.76)                     | 187      | 510      | 0.67<br>(0.54, 0.85)                     |                              |
| 11-25%<br>(ref)            | 271      | 852      | 1.00<br>(REF)                            | 292       | 690      | 1.00<br>(REF)                            | 309      | 706      | 1.00<br>(REF)                            |                              |
| 26-50%                     | 665      | 1299     | 1.64<br>(1.38, 1.95)                     | 430       | 629      | 1.78<br>(1.47, 2.16)                     | 284      | 458      | 1.53<br>(1.24, 1.89)                     |                              |
| 51%+                       | 509      | 770      | 2.11<br>(1.74, 2.56)                     | 144       | 189      | 2.16<br>(1.65, 2.83)                     | 80       | 121      | 1.84<br>(1.32, 2.56)                     |                              |
| Tumor Type                 |          |          |                                          |           |          |                                          |          |          |                                          |                              |
| Invasive                   |          |          |                                          |           |          |                                          |          |          |                                          |                              |
| 0-10%                      | 71       | 452      | 0.54<br>(0.4, 0.73)                      | 136       | 523      | 0.66<br>(0.51, 0.84)                     | 168      | 510      | 0.68<br>(0.53, 0.86)                     | 0.02                         |
| 11-25%<br>(ref)            | 225      | 852      | 1.00<br>(REF)                            | 238       | 690      | 1.00<br>(REF)                            | 267      | 706      | 1.00<br>(REF)                            |                              |
| 26-50%                     | 523      | 1299     | 1.57<br>(1.3, 1.89)                      | 358       | 629      | 1.82<br>(1.48, 2.24)                     | 251      | 458      | 1.58<br>(1.27, 1.97)                     |                              |
| 51%+                       | 408      | 770      | 2.08<br>(1.69, 2.55)                     | 126       | 189      | 2.29<br>(1.73, 3.04)                     | 74       | 121      | 1.99<br>(1.41, 2.8)                      |                              |
| In situ                    |          |          |                                          |           |          |                                          |          |          |                                          |                              |
| 0-10%                      | 15       | 452      | 0.65<br>(0.35, 1.19)                     | 18        | 523      | 0.36<br>(0.2, 0.63)                      | 19       | 510      | 0.63<br>(0.36, 1.11)                     |                              |
| 11-25%<br>(ref)            | 43       | 852      | 1.00<br>(REF)                            | 54        | 690      | 1.00<br>(REF)                            | 42       | 706      | 1.00<br>(REF)                            |                              |
| 26-50%                     | 136      | 1299     | 1.99<br>(1.38, 2.85)                     | 71        | 629      | 1.59<br>(1.08, 2.34)                     | 33       | 458      | 1.22<br>(0.75, 1.97)                     |                              |
| 51%+                       | 101      | 770      | 2.39<br>(1.61, 3.56)                     | 17        | 189      | 1.47<br>(0.82, 2.66)                     | 6        | 121      | 0.96<br>(0.39, 2.36)                     |                              |
| P <sub>heterogeneity</sub> |          |          | 0.68                                     |           |          | 0.15                                     |          |          | 0.42                                     |                              |

<sup>a</sup> MD, percent mammographic density;

<sup>b</sup> OR, odds ratio;

<sup>c</sup> CI, confidence interval.

<sup>d</sup> Adjusted for age, body mass index, and study.

**Additional Table 4-3** Pooled associations of categorical percent mammographic density for morphological subtypes of invasive breast cancer, by age

|                                         | Age < 55  |              |                                        |           | Age 55-64    |                                        |           |              | Age ≥ 65                               |           |              |                                        | P <sub>age-interaction</sub> |
|-----------------------------------------|-----------|--------------|----------------------------------------|-----------|--------------|----------------------------------------|-----------|--------------|----------------------------------------|-----------|--------------|----------------------------------------|------------------------------|
|                                         | No. cases | No. controls | OR <sup>a</sup> (95% CI) <sup>bc</sup> | No. cases | No. controls | OR <sup>a</sup> (95% CI) <sup>bc</sup> | No. cases | No. controls | OR <sup>a</sup> (95% CI) <sup>bc</sup> | No. cases | No. controls | OR <sup>a</sup> (95% CI) <sup>bc</sup> |                              |
| Histology <sup>d</sup>                  |           |              |                                        |           |              |                                        |           |              |                                        |           |              |                                        |                              |
| Ductal                                  |           |              |                                        |           |              |                                        |           |              |                                        |           |              |                                        |                              |
| 0-10%                                   | 61        | 452          | 0.58<br>(0.42, 0.8)                    | 103       | 523          | 0.66<br>(0.5, 0.87)                    | 117       | 510          | 0.67<br>(0.51, 0.88)                   |           |              |                                        |                              |
| 11-25% (ref)                            | 178       | 852          | 1.0<br>(REF)                           | 182       | 690          | 1.0<br>(REF)                           | 196       | 706          | 1.0<br>(REF)                           |           |              |                                        |                              |
| 26-50%                                  | 424       | 1299         | 1.61<br>(1.31, 1.97)                   | 276       | 629          | 1.83<br>(1.46, 2.3)                    | 184       | 458          | 1.58<br>(1.24, 2.03)                   |           |              |                                        |                              |
| 51%+                                    | 325       | 770          | 2.11<br>(1.68, 2.64)                   | 93        | 189          | 2.21<br>(1.62, 3.02)                   | 48        | 121          | 1.77<br>(1.19, 2.62)                   |           |              |                                        |                              |
| Lobular                                 |           |              |                                        |           |              |                                        |           |              |                                        |           |              |                                        |                              |
| 0-10%                                   | 4         | 452          | 0.24<br>(0.08, 0.71)                   | 19        | 523          | 0.64<br>(0.36, 1.16)                   | 21        | 510          | 0.55<br>(0.32, 0.96)                   |           |              |                                        |                              |
| 11-25% (ref)                            | 25        | 852          | 1.0<br>(REF)                           | 34        | 690          | 1.0<br>(REF)                           | 41        | 706          | 1.0<br>(REF)                           |           |              |                                        |                              |
| 26-50%                                  | 44        | 1299         | 1.22<br>(0.73, 2.04)                   | 38        | 629          | 1.31<br>(0.8, 2.12)                    | 37        | 458          | 1.56<br>(0.97, 2.5)                    |           |              |                                        |                              |
| 51%+                                    | 50        | 770          | 2.47<br>(1.44, 4.24)                   | 19        | 189          | 2.36<br>(1.29, 4.33)                   | 15        | 121          | 2.9<br>(1.5, 5.61)                     |           |              |                                        |                              |
| P <sub>heterogeneity</sub> <sup>e</sup> |           |              | 0.12                                   |           |              | 0.45                                   |           |              | 0.39                                   |           |              |                                        | 0.21                         |
| Histologic grade                        |           |              |                                        |           |              |                                        |           |              |                                        |           |              |                                        |                              |
| Well differentiated                     |           |              |                                        |           |              |                                        |           |              |                                        |           |              |                                        |                              |
| 0-10%                                   | 14        | 452          | 0.46<br>(0.25, 0.85)                   | 33        | 523          | 0.49<br>(0.32, 0.76)                   | 60        | 510          | 0.7<br>(0.49, 1)                       |           |              |                                        |                              |
| 11-25% (ref)                            | 54        | 852          | 1.0<br>(REF)                           | 80        | 690          | 1.0<br>(REF)                           | 94        | 706          | 1.0<br>(REF)                           |           |              |                                        |                              |
| 26-50%                                  | 116       | 1299         | 1.42<br>(1.0, 2.0)                     | 99        | 629          | 1.42<br>(1.03, 1.97)                   | 80        | 458          | 1.4<br>(1.01, 1.95)                    |           |              |                                        |                              |
| 51%+                                    | 108       | 770          | 2.32<br>(1.6, 3.35)                    | 36        | 189          | 1.73<br>(1.11, 2.69)                   | 25        | 121          | 1.92<br>(1.16, 3.19)                   |           |              |                                        |                              |
| Moderately differentiated               |           |              |                                        |           |              |                                        |           |              |                                        |           |              |                                        |                              |

|                              |     |      |                      |     |     |                      |     |     |                      |
|------------------------------|-----|------|----------------------|-----|-----|----------------------|-----|-----|----------------------|
| 0-10%                        | 32  | 452  | 0.67<br>(0.43, 1.04) | 48  | 523 | 0.6<br>(0.41, 0.87)  | 67  | 510 | 0.75<br>(0.53, 1.07) |
| 11-25% (ref)                 | 82  | 852  | 1.00<br>(REF)        | 91  | 690 | 1.0<br>(REF)         | 97  | 706 | 1.0<br>(REF)         |
| 26-50%                       | 201 | 1299 | 1.66<br>(1.25, 2.19) | 132 | 629 | 1.79<br>(1.33, 2.42) | 98  | 458 | 1.68<br>(1.22, 2.3)  |
| 51%+                         | 151 | 770  | 2.14<br>(1.58, 2.92) | 49  | 189 | 2.38<br>(1.59, 3.55) | 33  | 121 | 2.4<br>(1.51, 3.83)  |
| Poorly differentiated        | 466 |      |                      |     |     |                      |     |     |                      |
| 0-10%                        | 19  | 452  | 0.54<br>(0.31, 0.93) | 33  | 523 | 0.99<br>(0.6, 1.63)  | 24  | 510 | 0.43<br>(0.26, 0.72) |
| 11-25% (ref)                 | 58  | 852  | 1.00<br>(REF)        | 37  | 690 | 1.0<br>(REF)         | 53  | 706 | 1.0<br>(REF)         |
| 26-50%                       | 156 | 1299 | 1.8<br>(1.3, 2.48)   | 70  | 629 | 2.46<br>(1.6, 3.76)  | 48  | 458 | 1.58<br>(1.04, 2.41) |
| 51%+                         | 109 | 770  | 2.1<br>(1.47, 3.02)  | 25  | 189 | 3.29<br>(1.89, 5.73) | 9   | 121 | 1.31<br>(0.61, 2.79) |
| $P_{\text{heterogeneity}}^c$ |     |      | 0.54                 |     |     | 0.88                 |     |     | 0.83                 |
| Tumor size                   |     |      |                      |     |     |                      |     |     | 0.37                 |
| <1.1 cm                      |     |      |                      |     |     |                      |     |     |                      |
| 0-10%                        | 34  | 452  | 0.9<br>(0.59, 1.39)  | 63  | 523 | 0.79<br>(0.56, 1.11) | 82  | 510 | 1.01<br>(0.72, 1.41) |
| 11-25% (ref)                 | 74  | 852  | 1.00<br>(REF)        | 100 | 690 | 1.0<br>(REF)         | 91  | 706 | 1.0<br>(REF)         |
| 26-50%                       | 153 | 1299 | 1.3<br>(0.97, 1.75)  | 115 | 629 | 1.31<br>(0.97, 1.76) | 85  | 458 | 1.55<br>(1.12, 2.15) |
| 51%+                         | 117 | 770  | 1.61<br>(1.16, 2.24) | 34  | 189 | 1.33<br>(0.86, 2.06) | 21  | 121 | 1.57<br>(0.92, 2.67) |
| 1.1 - 2.0 cm                 |     |      |                      |     |     |                      |     |     |                      |
| 0-10%                        | 24  | 452  | 0.44<br>(0.27, 0.7)  | 45  | 523 | 0.6<br>(0.41, 0.89)  | 53  | 510 | 0.51<br>(0.35, 0.73) |
| 11-25% (ref)                 | 95  | 852  | 1.00<br>(REF)        | 85  | 690 | 1.0<br>(REF)         | 114 | 706 | 1.0<br>(REF)         |
| 26-50%                       | 211 | 1299 | 1.49<br>(1.14, 1.94) | 140 | 629 | 2.02<br>(1.5, 2.73)  | 104 | 458 | 1.5<br>(1.11, 2.04)  |
| 51%+                         | 166 | 770  | 1.98<br>(1.48, 2.66) | 60  | 189 | 3.09<br>(2.1, 4.54)  | 28  | 121 | 1.68<br>(1.04, 2.72) |

|                                               |     |      |                      |     |     |                      |     |     |                      |        |
|-----------------------------------------------|-----|------|----------------------|-----|-----|----------------------|-----|-----|----------------------|--------|
| 2.1+ cm                                       |     |      |                      |     |     |                      |     |     |                      |        |
| 0-10%                                         | 11  | 452  | 0.31<br>(0.15, 0.6)  | 21  | 523 | 0.47<br>(0.27, 0.81) | 25  | 510 | 0.41<br>(0.25, 0.68) |        |
| 11-25% (ref)                                  | 51  | 852  | 1.00<br>(REF)        | 47  | 690 | 1.0<br>(REF)         | 56  | 706 | 1.0<br>(REF)         |        |
| 26-50%                                        | 139 | 1299 | 2<br>(1.42, 2.82)    | 89  | 629 | 2.49<br>(1.69, 3.66) | 53  | 458 | 1.73<br>(1.15, 2.6)  |        |
| 51%+                                          | 109 | 770  | 2.88<br>(1.97, 4.21) | 27  | 189 | 2.92<br>(1.73, 4.93) | 23  | 121 | 3.65<br>(2.08, 6.39) |        |
| P <sub>heterogeneity</sub> <sup>c</sup> <0.01 |     |      |                      |     |     |                      |     |     |                      |        |
| Involvement of lymph nodes                    |     |      |                      |     |     |                      |     |     |                      |        |
| Negative                                      |     |      |                      |     |     |                      |     |     |                      |        |
| 0-10%                                         | 49  | 452  | 0.54<br>(0.38, 0.76) | 98  | 523 | 0.65<br>(0.49, 0.87) | 112 | 510 | 0.72<br>(0.54, 0.95) | 0.24   |
| 11-25% (ref)                                  | 160 | 852  | 1.00<br>(REF)        | 174 | 690 | 1.0<br>(REF)         | 174 | 706 | 1.0<br>(REF)         |        |
| 26-50%                                        | 334 | 1299 | 1.4<br>(1.13, 1.73)  | 249 | 629 | 1.72<br>(1.37, 2.16) | 163 | 458 | 1.56<br>(1.21, 2.01) |        |
| 51%+                                          | 267 | 770  | 1.89<br>(1.49, 2.39) | 89  | 189 | 2.19<br>(1.6, 3)     | 51  | 121 | 1.99<br>(1.35, 2.94) |        |
| Positive                                      |     |      |                      |     |     |                      |     |     |                      |        |
| 0-10%                                         | 18  | 452  | 0.55<br>(0.31, 0.97) | 27  | 523 | 0.64<br>(0.39, 1.06) | 20  | 510 | 0.35<br>(0.21, 0.61) |        |
| 11-25% (ref)                                  | 51  | 852  | 1.00<br>(REF)        | 50  | 690 | 1.0<br>(REF)         | 56  | 706 | 1.0<br>(REF)         |        |
| 26-50%                                        | 158 | 1299 | 2.15<br>(1.53, 3.02) | 85  | 629 | 2.1<br>(1.44, 3.06)  | 56  | 458 | 1.78<br>(1.19, 2.67) | 26-50% |
| 51%+                                          | 120 | 770  | 2.86<br>(1.98, 4.14) | 30  | 189 | 2.61<br>(1.58, 4.3)  | 16  | 121 | 2.32<br>(1.25, 4.31) |        |
| P <sub>heterogeneity</sub> <sup>c</sup> 0.11  |     |      |                      |     |     |                      |     |     |                      |        |
| ER status                                     |     |      |                      |     |     |                      |     |     |                      |        |
| Negative                                      |     |      |                      |     |     |                      |     |     |                      |        |
| 0-10%                                         | 8   | 452  | 0.35<br>(0.16, 0.76) | 23  | 523 | 0.86<br>(0.49, 1.49) | 17  | 510 | 0.53<br>(0.29, 0.98) |        |
| 11-25% (ref)                                  | 36  | 852  | 1.00                 | 35  | 690 | 1.0                  | 35  | 706 | 1.0                  |        |

|                              |     |      |                              |     |     |                               |     |     |                               |
|------------------------------|-----|------|------------------------------|-----|-----|-------------------------------|-----|-----|-------------------------------|
| 26-50%                       | 104 | 1299 | (REF)<br>2.08<br>(1.4, 3.11) | 64  | 629 | (REF)<br>2.03<br>(1.31, 3.14) | 24  | 458 | (REF)<br>1.11<br>(0.64, 1.91) |
| 51%+                         | 80  | 770  | 2.84<br>(1.83, 4.4)          | 17  | 189 | 1.84<br>(0.99, 3.41)          | 6   | 121 | 1.1<br>(0.44, 2.75)           |
| Positive                     |     |      |                              |     |     |                               |     |     |                               |
| 0-10%                        | 60  | 452  | 0.57<br>(0.42, 0.79)         | 104 | 523 | 0.61<br>(0.46, 0.8)           | 143 | 510 | 0.69<br>(0.53, 0.89)          |
| 11-25% (ref)                 | 182 | 852  | 1.00<br>(REF)                | 192 | 690 | 1.0<br>(REF)                  | 222 | 706 | 1.0<br>(REF)                  |
| 26-50%                       | 392 | 1299 | 1.44<br>(1.17, 1.76)         | 276 | 629 | 1.78<br>(1.42, 2.22)          | 215 | 458 | 1.64<br>(1.3, 2.07)           |
| 51%+                         | 315 | 770  | 1.96<br>(1.56, 2.45)         | 102 | 189 | 2.37<br>(1.75, 3.21)          | 64  | 121 | 2.1<br>(1.46, 3.02)           |
| $P_{\text{heterogeneity}}^c$ |     |      | 0.09                         |     |     | 0.38                          |     |     | 0.39                          |
| PR status                    |     |      |                              |     |     |                               |     |     | 0.10                          |
| Negative                     |     |      |                              |     |     |                               |     |     |                               |
| 0-10%                        | 18  | 452  | 0.48<br>(0.28, 0.84)         | 42  | 523 | 0.79<br>(0.52, 1.2)           | 31  | 510 | 0.59<br>(0.37, 0.94)          |
| 11-25% (ref)                 | 63  | 852  | 1.00<br>(REF)                | 67  | 690 | 1.0<br>(REF)                  | 57  | 706 | 1.0<br>(REF)                  |
| 26-50%                       | 144 | 1299 | 1.59<br>(1.15, 2.18)         | 90  | 629 | 1.55<br>(1.1, 2.18)           | 54  | 458 | 1.6<br>(1.07, 2.39)           |
| 51%+                         | 104 | 770  | 1.96<br>(1.38, 2.8)          | 33  | 189 | 2.01<br>(1.26, 3.2)           | 15  | 121 | 1.9<br>(1.02, 3.55)           |
| Positive                     |     |      |                              |     |     |                               |     |     |                               |
| 0-10%                        | 51  | 452  | 0.58<br>(0.41, 0.81)         | 86  | 523 | 0.59<br>(0.44, 0.79)          | 130 | 510 | 0.7<br>(0.54, 0.92)           |
| 11-25% (ref)                 | 152 | 852  | 1.00<br>(REF)                | 161 | 690 | 1.0<br>(REF)                  | 199 | 706 | 1.0<br>(REF)                  |
| 26-50%                       | 354 | 1299 | 1.56<br>(1.26, 1.94)         | 248 | 629 | 1.91<br>(1.51, 2.41)          | 183 | 458 | 1.55<br>(1.21, 1.97)          |
| 51%+                         | 287 | 770  | 2.16<br>(1.7, 2.74)          | 85  | 189 | 2.33<br>(1.69, 3.23)          | 54  | 121 | 1.95<br>(1.33, 2.86)          |
| $P_{\text{heterogeneity}}^c$ |     |      | 0.85                         |     |     | 0.21                          |     |     | 0.88                          |
| HER2 status                  |     |      |                              |     |     |                               |     |     | 0.03                          |
| Negative                     |     |      |                              |     |     |                               |     |     |                               |
| 0-10%                        | 40  | 452  | 0.52                         | 49  | 523 | 0.5                           | 101 | 510 | 0.83                          |

|                                         |     |      |                      |     |     |                      |     |     |                      |
|-----------------------------------------|-----|------|----------------------|-----|-----|----------------------|-----|-----|----------------------|
| 11-25% (ref)                            | 129 | 852  | (0.36, 0.77)         | 113 | 690 | (0.35, 0.73)         | 125 | 706 | (0.61, 1.13)         |
| 26-50%                                  | 288 | 1299 | 1.00<br>(REF)        | 149 | 629 | 1.0<br>(REF)         | 123 | 458 | 1.0<br>(REF)         |
| 51%+                                    | 217 | 770  | 1.52<br>(1.2, 1.93)  | 48  | 189 | 1.69<br>(1.27, 2.25) | 34  | 121 | 1.67<br>(1.25, 2.25) |
| Positive                                |     |      | 1.94<br>(1.49, 2.52) |     |     | 1.84<br>(1.23, 2.75) |     |     | 1.9<br>(1.2, 3.01)   |
| 0-10%                                   | 7   | 452  | 0.48<br>(0.2, 1.14)  | 11  | 523 | 0.9<br>(0.4, 2.02)   | 13  | 510 | 0.49<br>(0.24, 1.01) |
| 11-25% (ref)                            | 23  | 852  | 1.00<br>(REF)        | 15  | 690 | 1.0<br>(REF)         | 24  | 706 | 1.0<br>(REF)         |
| 26-50%                                  | 68  | 1299 | 2.03<br>(1.24, 3.34) | 28  | 629 | 2.44<br>(1.26, 4.71) | 20  | 458 | 1.41<br>(0.75, 2.64) |
| 51%+                                    | 44  | 770  | 2.19<br>(1.26, 3.82) | 9   | 189 | 2.64<br>(1.1, 6.36)  | 8   | 121 | 2.28<br>(0.96, 5.46) |
| $P_{\text{heterogeneity}}$ <sup>c</sup> |     |      | 0.63                 |     |     | 0.57                 |     |     | 0.48                 |

<sup>a</sup> OR, odds ratio

<sup>b</sup> CI, confidence interval

<sup>c</sup> Adjusted for age and body mass index, and study

<sup>d</sup> Mixed and other histology categories are excluded

<sup>e</sup> Test of heterogeneity in associations by subtype ( $P_{\text{trend}}$  for categories with natural ordering, i.e., tumor size and histologic grade)
